# Supplementary material
Source: Springer Nature journal article supplement (https://www.springermedizin.de/resource/supplementary/12885_2011_2935_MOESM6_ESM.pdf/9462314)
Supplement: MOESM6 [file 9462314]

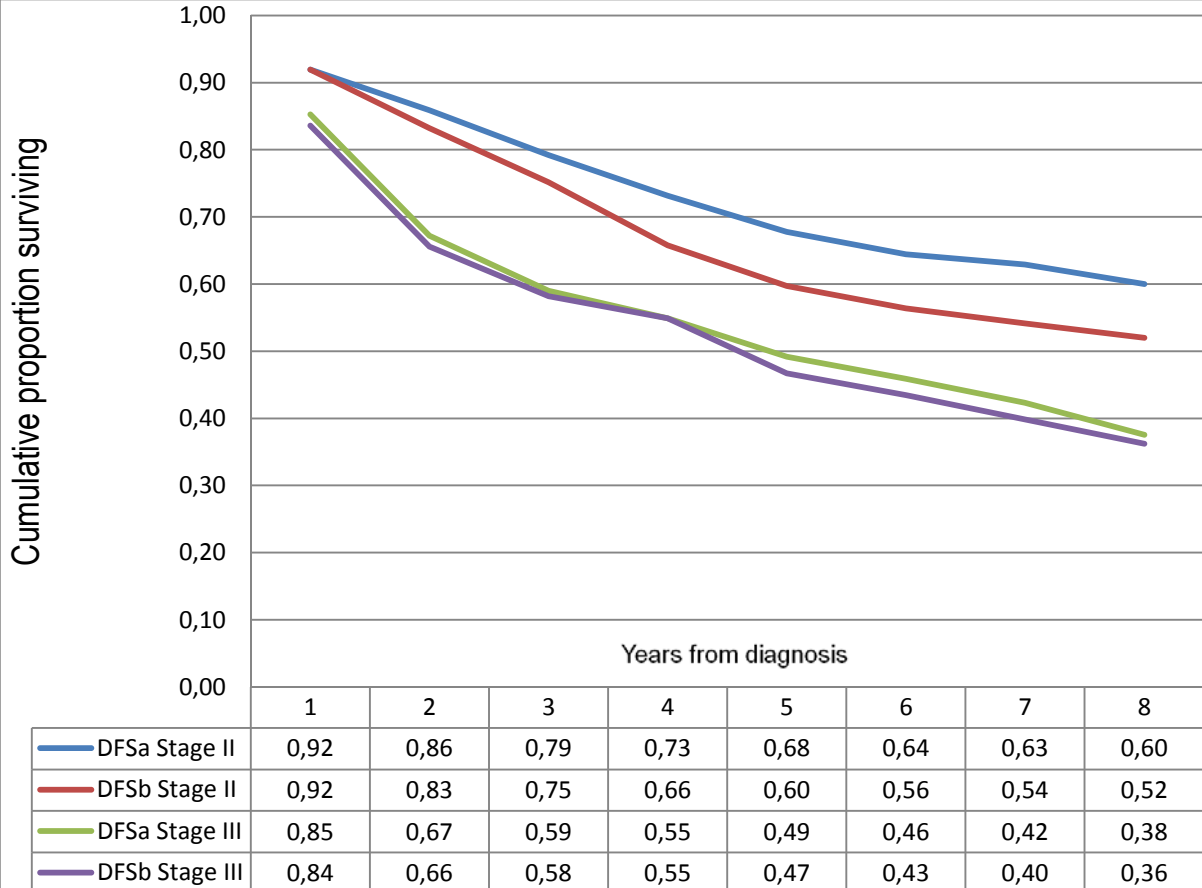

Cumulative proportion surviving ± Standard Error

| Years from diagnosis | 3        | 5        | 7        |
|----------------------|----------|----------|----------|
| Stage II DFSa        | 79,2±3,3 | 67,8±3,8 | 63,0±4,0 |
| Stage II DFSb        | 75,2±3,5 | 59,7±4,0 | 54,2±4,1 |
| Stage III DFSa       | 59,0±4,5 | 49,2±4,5 | 42,3±4,5 |
| Stage III DFSb       | 58,2±4,5 | 46,7±4,5 | 39,8±4,5 |
